P4594

## 5-years clinical outcomes of patients underwent percutaneous coronary intervention for calcified lesions with rotational atherectomy and second-generation drug eluting stent

K. Ogata, H. Koiwaya, K. Shinzato, Y. Goriki, G. Yoshioka, Y. Shibata

Miyazaki Medical Association Hospital, Miyazaki, Japan

**Background:** Percutaneous coronary Intervention (PCI) with rotational atherectomy (RA) was useful for severe calcified lesions. However, the long-term clinical outcomes of PCI with second-generation drug eluting stent (DES) following RA has been still unclear.

**Purpose:** The purpose of this study was to investigate the long-term clinical outcomes of RA followed by second-generation DES.

**Methods:** We retrospectively enrolled 254 consecutive patients treated with second-generation DES following RA. The primary outcome was the cumulative 5-year incidence of MACE, defined as cardiac death, myocardial infarction, clinically-driven target lesion revascularization and definite stent thrombosis.

**Results:** The incidence of MACE was 22.8% at 5-years. Multivariate analysis showed 3 predictors of MACE, hemodialysis, diabetic mellitus and extremely angulated lesions ( $>90^\circ$ ). Significantly higher MACE was observed in the high-risk ( $\geq 2$  risk factors) group, compared with the low-risk ( $< 2$  risk factors) group (68.7% vs. 18.7%,  $P < 0.001$ , Figure).

**Conclusions:** The long-term clinical outcomes of PCI for severely calcified lesions was acceptable. However, the clinical outcomes of patients classified high risk cohort was unsatisfactory.

Multivariate analysis for MACE at 5 year

|                                     | Hazard ratio (95% Confidence Interval) | P-value |
|-------------------------------------|----------------------------------------|---------|
| Diabetic Mellitus                   | 2.58 (1.35–4.91)                       | 0.004   |
| Hemodialysis                        | 4.57 (1.64–12.76)                      | 0.004   |
| extremely angulated ( $>90^\circ$ ) | 3.08 (1.06–8.93)                       | 0.04    |

Figure ; Kaplan–Meier curves for 5-year incidence of major adverse cardiovascular events

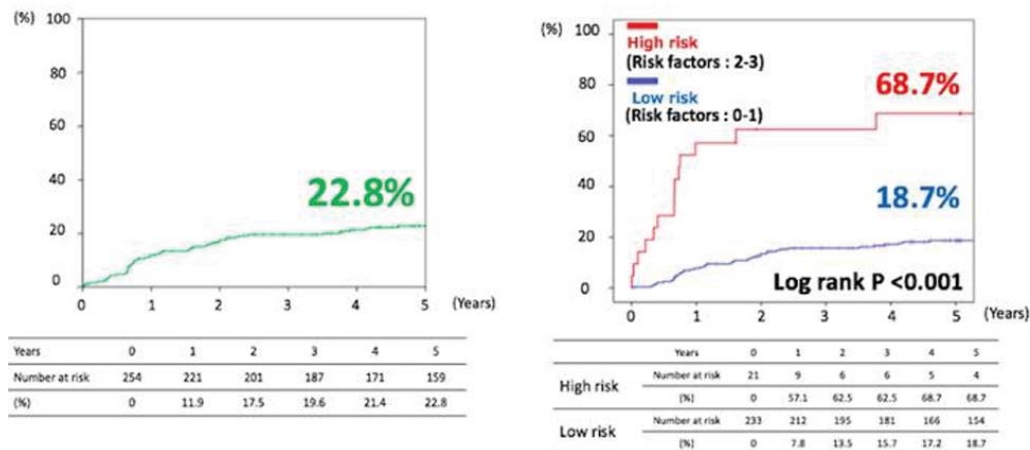

Kaplan–Meier curves for 5-years MACE
